# Supplementary material for: TrxR inhibition and antiproliferative activities of structurally diverse gold N-heterocyclic carbene complexes
Source: Royal Society of Chemistry journal article supplement (doi:10.1039/c3md00076a), 2013-01-01
Supplement: c3md00076a.pdf [file c3md00076a.pdf]

## Supporting Information

### TrxR Inhibition and Antiproliferative Activities of Structurally Diverse Gold *N*-Heterocyclic Carbene Complexes

Riccardo Rubbiani, Esther Schuh, Andreas Meyer, Jessika Lemke, Jan Wimberg, Nils Metzler-Nolte, Franc Meyer, Fabian Mohr and Ingo Ott

### Full crystallographic and refinement parameters as well as tables with bond distances and angles

**Tab S1.:** selected bond distances (Å) and angles (°) for **1f**

| Atoms    | Bond distances (Å) | Atoms      | Bond angles (°) |
|----------|--------------------|------------|-----------------|
| C1-Au1   | 2.013(4)           | C1-Au1-S1  | 175.1(1)        |
| S1-Au1   | 2.302(1)           | C17-S1-Au1 | 101.2(2)        |
| C1-N1    | 1.343(6)           | N1-C1-Au1  | 127.8(3)        |
| C1-N2    | 1.358(5)           | N2-C1-Au1  | 126.4(3)        |
| S1-C17   | 1.792(5)           | N1-C1-N2   | 105.5(4)        |
| C16-O1   | 1.391(7)           |            |                 |
| Au1-Au1* | 3.2688(2)          |            |                 |

**Tab S2.:** Crystal data and structure refinement for **1f**

|                                                     |                                                     |
|-----------------------------------------------------|-----------------------------------------------------|
| Empirical formula                                   | C <sub>26</sub> H <sub>27</sub> N <sub>2</sub> OSAu |
| Formula weight [g/mol]                              | 612.52                                              |
| Color and shape                                     | Colorless needles                                   |
| Crystal system                                      | Triclinic                                           |
| Space group                                         | P-1                                                 |
| Crystal size [mm <sup>3</sup> ]                     | 0.11 x 0.03 x 0.02                                  |
| <i>a</i> [Å]                                        | 9.7700(2)                                           |
| <i>b</i> [Å]                                        | 9.7877(3)                                           |
| <i>c</i> [Å]                                        | 12.2436(5)                                          |
| $\alpha$ [°]                                        | 88.650(3)                                           |
| $\beta$ [°]                                         | 87.135(3)                                           |
| $\gamma$ [°]                                        | 75.316(2)                                           |
| Volume [Å <sup>3</sup> ]                            | 1131.09(6)                                          |
| Temperature [K]                                     | 150                                                 |
| <i>Z</i>                                            | 2                                                   |
| $\mu$ [mm <sup>-1</sup> ]                           | 6.617                                               |
| $\rho_{\text{calc}}$ [g/cm <sup>3</sup> ]           | 1.798                                               |
| Theta range for data collection [°]                 | 3.1752 - 58.6592                                    |
| Reflections collected                               | 9021                                                |
| Independent reflections                             | 5206[R(int)=0.0245]                                 |
| Final R indexes [I>2 $\sigma$ (I)]                  | 0.0315                                              |
| Final R indexes [all data]                          | wR <sub>2</sub> 0.0652                              |
| Goodness-of-fit on F <sup>2</sup>                   | 1.107                                               |
| Largest diff. peak/hole [e/Å <sup>3</sup> ] min/max | 1.864 / -2.156                                      |
| CCDC deposition code                                | 927677                                              |
